# Supplementary material for: Rapid Screening and Identification of Daidzein Metabolites in Rats Based on UHPLC-LTQ-Orbitrap Mass Spectrometry Coupled with Data-Mining Technologies
Source: MDPI journal article supplement (doi:10.3390/molecules23010151), 2018-01-12
Supplement: s1 [file s1]

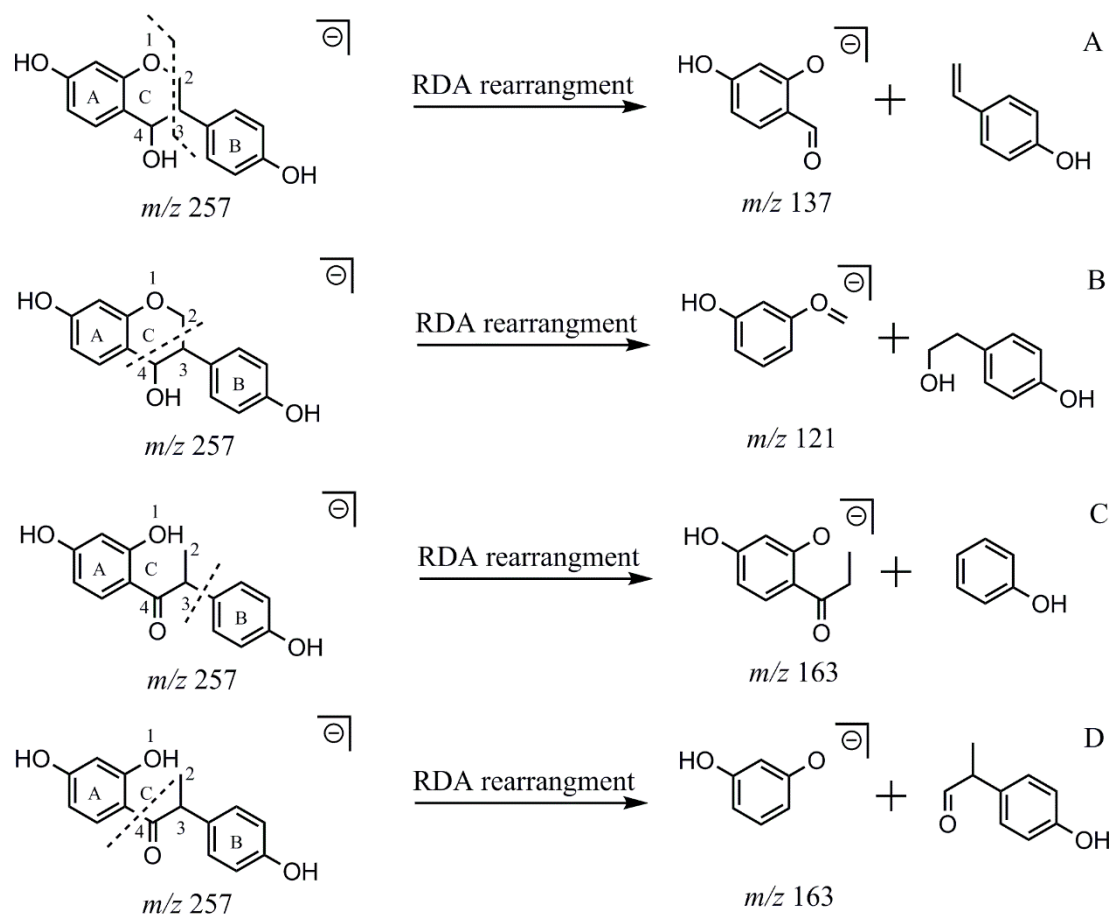

**Figure S2.** RDA rearrangements in MS/MS spectra of daidzein metabolites.
